# Supplementary material for: Enhanced performance of all solid-state quantum dot-sensitized solar cells via synchronous deposition of PbS and CdS quantum dots
Source: Royal Society of Chemistry journal article supplement (doi:10.1039/c9nj05344a), 2019-11-28
Supplement: c9nj05344a1.pdf [file c9nj05344a1.pdf]

## Supporting Information

### **Enhanced performance of all solid-state quantum dot-sensitized solar cells via synchronous deposition of PbS and CdS quantum dots**

Xiaoli Mao,<sup>1</sup> Jianguo Yu,<sup>1</sup> Jun Xu,<sup>1</sup> Juntian Zhou,<sup>2</sup> Cheng Luo,<sup>1</sup> Lang Wang,<sup>2</sup> Haihong Niu,<sup>2</sup> Jinzhang Xu,<sup>2</sup> and Ru Zhou <sup>\*,2</sup>

<sup>1</sup> School of Electronic Science and Applied Physics, Hefei University of Technology, Hefei 230009, P. R. China

<sup>2</sup> School of Electrical Engineering and Automation, Hefei University of Technology, Hefei 230009, P. R. China

\* Corresponding author: [zhouru@hfut.edu.cn](mailto:zhouru@hfut.edu.cn) (R. Zhou)

**Table S1** Photovoltaic parameters of PbS and CdS-based solid-state QDSCs.

| Sample | $V_{oc}$ (V) | $J_{sc}$ (mA/cm <sup>2</sup> ) | FF   | $\eta$ (%) |
|--------|--------------|--------------------------------|------|------------|
| CdS    | 0.22         | 0.41                           | 0.30 | 0.03       |
| PbS    | 0.23         | 0.36                           | 0.26 | 0.02       |

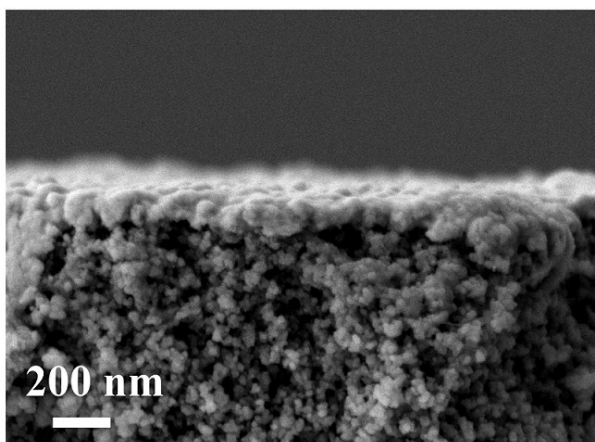

**Figure S1** Cross-section SEM image of as-prepared solid-state PbS QDSCs. The deposition of an Au layer on top of the device is highlighted.

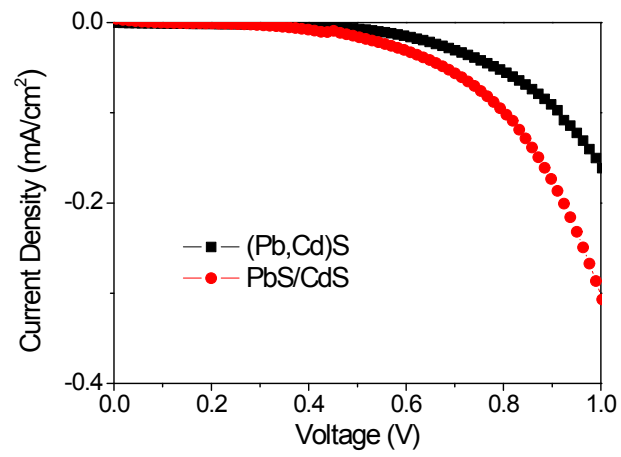

**Figure S2** Current density-voltage (J-V) curves measured under dark.
